# Supplementary material for: MicroRNA-107-5p suppresses non-small cell lung cancer by directly targeting oncogene epidermal growth factor receptor
Source: PubMed Central journal article supplement (PMC5593621; doi:10.18632/oncotarget.18505), 2017-06-16
Supplement: oncotarget-08-57012-s001.pdf [file oncotarget-08-57012-s001.pdf]

# MicroRNA-107-5p suppresses non-small cell lung cancer by directly targeting oncogene epidermal growth factor receptor

## SUPPLEMENTARY MATERIALS

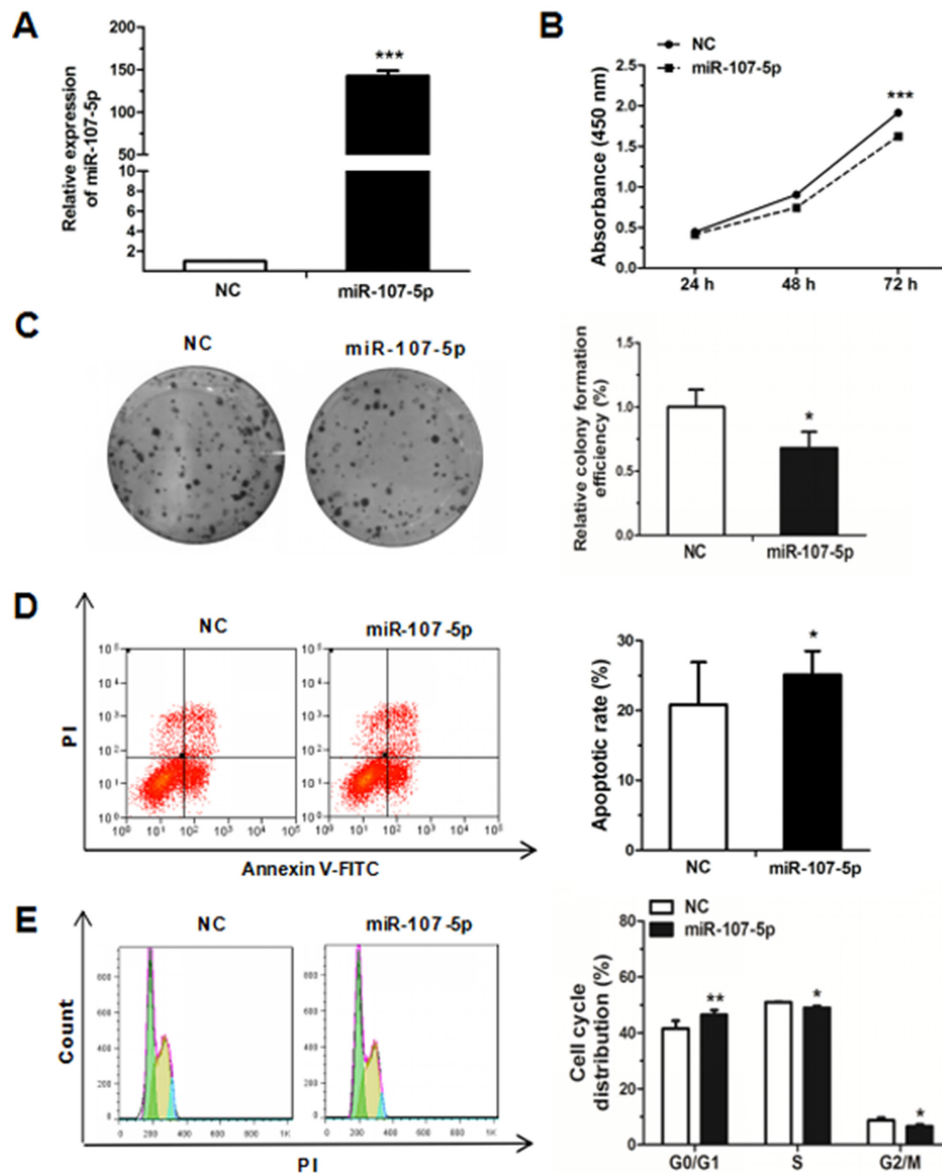

**Supplementary Figure 1: MiR-107-5p suppresses cell proliferation, cell cycle and promotes apoptosis in 95-D cell lines.** (A) The expression of miR-107-5p was measured by qRT-PCR in 95-D cells 48 h after transfection with NC (negative control) or miR-107-5p mimic. (B) 95-D cells were transfected with NC or miR-107-5p mimic, and cell proliferation was determined by CCK-8. (C) Colony formation assay was performed in 95-D cells transfected with NC or miR-107-5p mimic. (D) Cell apoptosis situations of 95-D cells transfected with NC or miR-107-5p mimic were increased by flow cytometry. (E) The cell cycle distributions of 95-D cells transfected with NC or miR-107-5p mimic were detected by flow cytometry. All experiments were repeated in triplicate (\* $P < 0.05$ , \*\*  $P < 0.01$ , \*\*\*  $P < 0.001$ ).

**Supplementary Table 1: The clinical-pathological features of 61 cases NSCLC patients**

See Supplementary File 1

**Supplementary Table 2: PCR primers**

| <b>Primer name</b> | <b>Primer sequences(5'-3')</b>     |
|--------------------|------------------------------------|
| 18S RNA(F)         | AGGAATCCCCAGTAAGTGCG               |
| 18S RNA(R)         | GCCTCACTAAACCATCCAA                |
| U6 snRNA(F)        | CTCGCTTCGGCAGCACA                  |
| U6 snRNA(R)        | AACGCTTCACGAATTTGCGT               |
| EGFR-3'-UTR(F)     | GCTCTAGAGCGAGCGTTAGACTGACTTGTTTG   |
| EGFR-3'-UTR(R)     | GGAATCCAGCGGTGCTATCCTTAGGTATT      |
| EGFR-3'-mUTR(F)    | AGTAAGGTCCCCCTGTCTTGCTGTCATGAA     |
| EGFR-3'-mUTR(R)    | CAGGGGGACCTTACTGAGTTTCAAAACAATG    |
| EGFR(F)            | CGCATTAGCTCTTAGACCCA               |
| EGFR(R)            | AGTAAGTACCGTGGGGACAT               |
| pri-miR-107(F)     | CGGGATCCCGAATGTGAGGAAAAGGTCTGAGC   |
| pri-miR-107(R)     | CCGCTCGAGCGGCCTCAACTCCTCTTTCCTGTCT |
| miR-107-5p         | AGCAGCATTGTACAGGGCTATCA            |
